# Supplementary material for: From EHR to PHR: let’s get the record straight
Source: PubMed Central journal article supplement (PMC6756332; doi:10.1136/bmjopen-2019-029582), 2019-09-18
Supplement: bmjopen-2019-029582.draft_revisions.pdf [file bmjopen-2019-029582.draft_revisions.pdf]

# BMJ Open

BMJ Open is committed to open peer review. As part of this commitment we make the peer review history of every article we publish publicly available.

When an article is published we post the peer reviewers' comments and the authors' responses online. We also post the versions of the paper that were used during peer review. These are the versions that the peer review comments apply to.

The versions of the paper that follow are the versions that were submitted during the peer review process. They are not the versions of record or the final published versions. They should not be cited or distributed as the published version of this manuscript.

BMJ Open is an open access journal and the full, final, typeset and author-corrected version of record of the manuscript is available on our site with no access controls, subscription charges or pay-per-view fees (<http://bmjopen.bmj.com>).

If you have any questions on BMJ Open's open peer review process please email [info.bmjopen@bmj.com](mailto:info.bmjopen@bmj.com)

# BMJ Open

## From EHR to PHR: Let's Get the Record Straight

|                                 |                                                                                                                                                                                                                                                                                               |
|---------------------------------|-----------------------------------------------------------------------------------------------------------------------------------------------------------------------------------------------------------------------------------------------------------------------------------------------|
| Journal:                        | <i>BMJ Open</i>                                                                                                                                                                                                                                                                               |
| Manuscript ID                   | bmjopen-2019-029582.R1                                                                                                                                                                                                                                                                        |
| Article Type:                   | Communication article                                                                                                                                                                                                                                                                         |
| Date Submitted by the Author:   | 20-Feb-2019                                                                                                                                                                                                                                                                                   |
| Complete List of Authors:       | Symons, Joshua D; Imperial College London, Department of Surgery & Cancer<br>Ashrafian, Hutan; Imperial College London, Department of Surgery & Cancer;<br>Duncombe, Rachel; Salford Royal NHS Foundation Trust<br>Darzi, Ara; Imperial College London, Institute of Global Health Innovation |
| <b>Primary Subject Heading</b>: | Patient-centred medicine                                                                                                                                                                                                                                                                      |
| Secondary Subject Heading:      | Public health                                                                                                                                                                                                                                                                                 |
| Keywords:                       | Patient Health Record, Electronic Health Record, Patient Empowerment, Digital, Digital Health                                                                                                                                                                                                 |
|                                 |                                                                                                                                                                                                                                                                                               |

SCHOLARONE™  
Manuscripts

## From EHR to PHR: Let's Get the Record Straight

Joshua Symons<sup>a</sup>, Hutan Ashrafian<sup>b</sup>, Rachel Dunscombe<sup>c</sup>, Ara Darzi<sup>d</sup>

<sup>a</sup> Director, Big Data & Analytical Unit (BDAU), Centre for Health Policy (CHP), Institute of Global Health Innovation (IGHI), Imperial College London

<sup>b</sup> Chief Scientific Adviser and Honorary Senior Clinical Fellow in Surgery, Institute of Global Health Innovation (IGHI), Imperial College London

<sup>c</sup> Group Director of Digital and Chief Information Officer, Salford Royal NHS Foundation Trust and Northern Care Alliance

<sup>d</sup> Director, Institute of Global Health Innovation (IGHI), Imperial College London

Corresponding author - Joshua Symons (j.symons@imperial.ac.uk)

10<sup>th</sup> Floor QEQM (Queen Elizabeth the Queen Mother) Building

Room 1069

St Mary's Hospital Campus

Imperial Health Care NHS Trust

Praed Street, W2 1NY

London, UK

## Abstract

The importance of implementing integrated electronic health records as a route to enhance the quality of health delivery has been increasingly understood. Electronic health records however carry several limitations that include major fragmentation through multiple providers and protocols throughout the NHS. Analysing the digital healthcare landscape, we identify that adopting a patient health record system can empower patients and allow better harmonisation of clinical data at a national level. We propose regional patient health record hubs to provide a universal interface that integrates digital health data at a regional level. This will reduce the complexity of connections, decrease governance challenges and interoperability issues while also providing a safe platform for high-quality scalable and sustainable digital solutions, including AI, across the NHS.

1  
2  
3 The importance of implementing integrated electronic health records (EHR) as a route to enhance the  
4 quality of health delivery were outlined as early as 1998. The benefits of universal access for patients,  
5 clinicians, policy makers and administrators include (i) increasing confidence and convenience through  
6 streamlined access to information, (ii) improving clinical outcomes through enhanced care  
7 communication, (iii) better decision making through access to real-time evidence and (iv) enabling  
8 planning and productivity gains through increased efficiency.<sup>1</sup> In 2014, it was proposed that by March of  
9 2018, all individuals should have both viewing and editing capabilities for their own health record.<sup>2</sup> This  
10 proposal aligns with the recent definition of a personal health record (PHR) by the Royal College of  
11 Physicians as “digital tools that allow a citizen to interact with health and social care services, have  
12 access to the clinical content in their record, capture, record and if they wish, share their own data with  
13 clinicians and others”.<sup>3</sup> PHRs therefore provide an integral part of health record integration that is not  
14 currently provided by EHR systems alone. Furthermore, PHRs have been shown to contribute to health  
15 awareness and could be key in empowering patients to take direct control of their own healthcare.<sup>4</sup>  
16 However, despite widespread availability of multiple PHR solutions in the UK, 2018 is now passing  
17 without substantial adoption and patients able to meaningfully interact with their own healthcare data.  
18  
19  
20  
21

22 Although there has been growth in the number of PHR providers in almost all regions of the UK, PHR  
23 uptake by patients and organisations is still remarkably slow.<sup>5</sup> In response to a survey in 2016, less than  
24 500,000 people were individually registered users of PHR while 1,377 organisations, including 122 NHS  
25 Trusts, 16 Clinical Commissioning Groups (CCGs), 1,184 General Practice Surgeries (GPs), 33+ local  
26 authorities, 15+ social care providers and 7 health boards were listed as organisational users of PHR.<sup>6</sup>  
27 However, it is not clear if single organisations have integrated with multiple PHR providers thereby  
28 conflating the totals and making them appear larger than they are, such as indicating that nearly half of  
29 all NHS Trusts are organisational users.<sup>6</sup> Slow uptake has been attributed to barriers in (i) governance  
30 approval, (ii) clinical engagement, (iii) patient awareness and (iv) integration with local systems.<sup>6</sup>  
31 Challenges in governance are being overcome by legislation changes informed by recent Caldicott  
32 reports.<sup>6</sup> Some existing PHR systems give patients choice over sharing of their data addressing some of  
33 the governance concerns. Clinician and patient experience has been investigated to determine personal  
34 barriers to PHR adoption.<sup>3</sup> However, PHR integration with local systems, or PHR interoperability,  
35 remains an unexplored challenge. Despite a large amount of research in EHR interoperability, there is a  
36 paucity of evidence regarding barriers for EHR integration with PHR. The prospect of universally  
37 connecting PHR systems is daunting considering individual CCGs, NHS Trusts, GPs, PHR and EHR vendors  
38 and exchange protocols (**Table 1 and Figure 1**). Established node connection formulae demonstrates  
39 that just over 8,500 organisations could require over 36 million individual connections to provide real-  
40 time connectivity of records for patients at any location.<sup>7 8</sup> This doesn't take into account additional  
41 organisations such as laboratories, social and community care. Further addition of PHR providers,  
42 personal devices and applications will exponentially increase this complexity. Solutions have been  
43 proposed to deal with some of this complexity as part of national programmes but these fall short of  
44 implementing the benefits of PHR.  
45  
46  
47  
48  
49  
50  
51  
52  
53  
54  
55  
56  
57  
58  
59  
60

| Type                | Count                                                                                                                                                                                                                                    |
|---------------------|------------------------------------------------------------------------------------------------------------------------------------------------------------------------------------------------------------------------------------------|
| Care organisations  | (207) CCGs<br>(152) acute specialist and non-specialists trusts<br>(54) mental health trusts<br>(35) community providers<br>(10) ambulance trusts<br>(853) for-profit and not-for-profit independent sector organisations<br>(7,148) GPs |
| PHR providers       | (29) independent providers recorded by RCP                                                                                                                                                                                               |
| GP EHR providers    | (4) EMIS, TPP, INPS, Microtest                                                                                                                                                                                                           |
| Trust EHR providers | (7) Allscripts, Cerner, Epic, Intersystems, Lorenzo, Meditech, OpenEHR                                                                                                                                                                   |
| Exchange protocols  | (6) HL7, FHIR, IHE, CDA, XDS, DICOM                                                                                                                                                                                                      |

**Table 1** Examples of different care providers, PHR and EHR providers and exchange protocols used within the UK. List is non-exhaustive.

Local Health and Care Record Exemplars (LHCREs) have been created with the same proposed benefits outlined in 1998 through integration of care records, such as primary care with secondary, mental health and social at a regional level.<sup>9</sup> Although LHCREs aim to achieve real-time data sharing of both identifiable and de-personalised data for direct care, the scope of these integrated records does not universally include provision of linked data for research or patient access to read and write to integrated records.<sup>9</sup> Approaches to governance of data in LHCRE are not universal, with some initiatives putting control of research and sharing permission with GPs and Academic Health Science Networks (AHSNs) while others form independent research advisory groups. This creates regional variation in data sharing practices, record access and approved uses of data. Furthermore, resources are limited, with some LHCRE funding only covering £7.5 million of the estimated £90 million 5 year cost, making non-critical features difficult to justify.<sup>10</sup> This raises important questions around sustainability of LHRCEs which have yet to be answered. Therefore, although LHCRE may provide integration of records to improve direct care, patients will not necessarily benefit from access to these records, researchers may not be able to utilise these linked records to produce evidence and industry may not have access to the benefits of real-time data access to develop new digital interventions. Digital innovation hubs will go some way in addressing use of LHCRE data for innovative research but will not provide patient access or data input into these records.<sup>11</sup>

At a national level, the National Record Locator Service (NRLS) has been proposed to achieve harmonisation of individual health records across the U.K.<sup>12</sup> This will be achieved by connecting NRLS to various patient master index (PMI) systems at care providers which will keep care records up to date. Although this important service will aim to provide a pointer to a single source of truth record for each patient, it will not guarantee the quality of that record or provide integration of records for non-clinical sources of patient data. The proof of concept for the service will also not include retrieval of the actual patient records, therefore this service will not be able to provide real-time access to patient records at a national level.<sup>12</sup> NRLS will require that care provider services will be always available for querying using a pull method, but services may not be available resulting in limited access to required records. Connectivity to records at a national level will be dependent on the quality of local PMI and EHR systems. Such connectivity issues could result in patient safety incidents due to missing records.

1  
2  
3 The newly released *NHS App* will allow patients to check symptoms, book GP appointments, manage  
4 repeat prescriptions, view their own primary care record and manage data sharing preferences.<sup>13</sup>  
5 Although this mobile application will create a baseline entry point for every NHS patient to view their GP  
6 records, it does not include any ability to edit or even view the entire patient record. Other features will  
7 allow patients to interact with portions of the health and social care system but listed benefits indicate  
8 that this tool will provide a passive consumption service for commissioned digital services, not allow  
9 patients to integrate digital services they have already chosen. Despite improving access to NHS services  
10 and providing a starting point for universal primary care record access, the NHS application in its current  
11 form will not provide a full universal PHR solution in its initial form and will overlap with functionality  
12 provided by existing EHR portals and PHR platforms.<sup>14 15 16</sup> Although the NHS App cannot replicate  
13 existing PHR solutions and may not be designed to replace them it is unclear at this time how the  
14 release of this application might impact the ability of PHR providers to market their products and  
15 services. It is also unclear on how patient opt-out for data sharing in the NHS App will impact data  
16 sharing at a regional level as patients might believe that using the application to opt-out of data sharing  
17 will stop any sharing of their data in any system, resulting in a lack of clarity and transparency for  
18 patients and organisations alike.  
19  
20  
21  
22

23 True PHR is the only current proposed health record solution which provides a choice to patients for  
24 inputting into and controlling their own health records. Current PHR provider models are mainly centred  
25 on integrating with local EHR systems at a care provider level, which has been shown to be more  
26 beneficial than standalone PHR systems, although both models have been reported as offering  
27 healthcare benefits.<sup>6</sup> Although this meets the criteria of providing patients access, it does not provide  
28 patients a choice in features of different PHR providers or join data across multiple providers.  
29 Integration is also done using bespoke interoperability with local providers one solution at a time. To  
30 provide choice in PHR features, integration with multiple PHR providers is required by single institutions.  
31 This increases the burden and cost to these institutions to provide multiple PHR solutions and makes  
32 universal adoption of PHR more difficult as patients and clinicians are unable to determine what benefit  
33 different PHR solutions may provide. Stand-alone PHR systems which enable patient input will not  
34 necessarily be integrated with PMI systems and therefore data from these systems will not be available  
35 to NRLS, making the patient responsible for communicating relevant information to clinicians and  
36 exacerbating the existing burden for patients.  
37  
38  
39  
40

41 The dangers of trying to individually connect EHRs nationally and regionally while simultaneously  
42 increasing adoption of PHR with the current system structure are substantial. This could lead to record  
43 fragmentation which is an established concern and possibly lock data into another silo, unavailable to  
44 the persons who need it.<sup>17</sup> Additionally, there could be an increasing disparity between the information  
45 patients think is available to carers compared to what exists at the point of care. NRLS would need to  
46 connect to more systems with less certainty over the range of standards which will be required to locate  
47 records. Although the PHR adoption toolkit provides guidance for most standards, implementation of  
48 these interoperability standards will inevitably vary.<sup>18</sup> Currently there is also no solution for universal  
49 integration of personal device data into most EHR systems. Some PHR systems provide this functionality,  
50 but iterative evaluation of digital interventions will not be possible where personal device data is not  
51 being integrated back into clinical records. A recent report by REFORM has recommended that  
52 integration of such data should be explicitly included in NHS procurement contracts to ensure that  
53  
54  
55  
56  
57  
58  
59  
60

1  
2  
3 digital interventions can be tested for safety and efficacy. Universal integration of this form of patient  
4 data into clinical records will be a large challenge for any EHR provider.  
5

6 To overcome the barriers of universal record integration and PHR adoption, we propose a new model of  
7 connecting systems with a PHR “hub” providing integration at regional levels for a single ‘source of  
8 truth’ PHR (**Figure 1**). The PHR hub would consolidate data across EHR and PHR providers thereby  
9 reducing complexity immensely while simultaneously moving towards universal choice and control for  
10 patients. Complexity, barriers to interoperability and the potential for vendor lock-in would be further  
11 reduced by requiring open standards in the PHR hub.<sup>19</sup> Such an initiative would naturally complement  
12 existing LHCREs, reducing variability for LHCRE implementation and enabling LHCREs to focus on critical  
13 record integration. Patient controlled PHRs would decrease governance burden for organisations as  
14 patients themselves would control records or be able to delegate this to care providers as needed.  
15 Furthermore, each regional PHR would facilitate universal record validity by bridging local patient  
16 master index (PMI) systems to keep patient details up to date. This would then ease requirements for  
17 the National Record Locator Service (NRLS).<sup>12</sup> PHR hubs could also separate care record service from  
18 care settings allowing for better security and easier data migrations. PHR hubs would also provide a  
19 single integration point between multiple PHR and EHR providers taking away the burden of integration  
20 from the care provider. Finally, universal PHR accessibility would allow PHR vendors to market directly  
21 to patients supported by clinician conversations around the benefits, possibly providing a far more  
22 efficient method of increasing patient adoption and providing an easier path to self-care.  
23  
24  
25  
26

27 The ambition of achieving the potential of PHRs has long been established. Barriers such as a lack of EHR  
28 systems, lack of PHR functionality in existing EHR systems, failed top-down implementation and  
29 interoperability issues have presented formidable opponents to this ambition. Enabling true patient  
30 empowerment requires that organisations are able to universally connect to PHR providers and that  
31 patients are able to select the PHR provider they prefer. Only where PHR adoption is driven by patients  
32 will PHR access fully satisfy the requirements of its intended users. We have proposed a new call for  
33 regional PHR hubs to provide an universal PHR interface and integrate EHR systems at a regional level.  
34 This will reduce the complexity of connections, decrease governance challenges and interoperability  
35 issues while also providing a safe platform for high-quality scalable and sustainable digital solutions,  
36 including AI, across the NHS. Achieving standardised universal PHR adoption in the NHS will unlock the  
37 true value of the UK’s integrated healthcare records.  
38  
39  
40  
41  
42  
43  
44  
45  
46  
47  
48  
49  
50  
51  
52  
53  
54  
55  
56  
57  
58  
59  
60



## Figure Legend

Figure 1: PHR hubs would transform the complex ecosystem (left) including high patient and provider burden to a simpler ecosystem (right) centred around the patient increasing choice and system flexibility

Funding: This research had infrastructure support provided by the NIHR Imperial Biomedical Research Centre (BRC)

Competing Interests: None

Authorship statement: All authors (JS, HA, RD, AD) all contributed to the conception/ design/ acquisition/ analysis/ interpretation of data for this work. They all contributed to the drafting/ intellectual content and gave final approval for publishing.

## References

- <sup>1</sup> NHS Executive. Information for health: an information strategy for the modern NHS 1998-2005. Department of Health 1998. [http://webarchive.nationalarchives.gov.uk/20120503231618/http://www.dh.gov.uk/prod\\_consum\\_dh/groups/dh\\_digitalassets/@dh/@en/documents/digitalasset/dh\\_4014469.pdf](http://webarchive.nationalarchives.gov.uk/20120503231618/http://www.dh.gov.uk/prod_consum_dh/groups/dh_digitalassets/@dh/@en/documents/digitalasset/dh_4014469.pdf)
- <sup>2</sup> Kelsey T, Cavendish W. Personalised Health and Care 2020: Using Data and Technology to Transform Outcomes for Patients and Citizens. National Information Board 2014. [https://assets.publishing.service.gov.uk/government/uploads/system/uploads/attachment\\_data/file/384650/NIB\\_Report.pdf](https://assets.publishing.service.gov.uk/government/uploads/system/uploads/attachment_data/file/384650/NIB_Report.pdf)
- <sup>3</sup> Wyatt J, Hoogewerf J, Quinn N. Personal health record (PHR) User insights. *RCP* 2017. <https://www.rcplondon.ac.uk/projects/outputs/personal-health-record-phr-user-insights> (accessed 3 Sep 2018).
- <sup>4</sup> Ozok AA, Wu H, Garrido M, Pronovost PJ, Gurses AP. Usability and perceived usefulness of personal health records for preventive health care: A case study focusing on patients' and primary care providers' perspectives. *Applied ergonomics*. 2014 May 1;45(3):613-28.
- <sup>5</sup> PHR locations map - NHS Digital. NHS Digital. 2018. <https://digital.nhs.uk/services/personal-health-records-adoption-toolkit/phr-locations-map> (accessed 3 Sep 2018).
- <sup>6</sup> Wyatt J, Sathanandam S, Rastall P. Personal health record (PHR) landscape review Final report. *RCP* 2016. <https://www.rcplondon.ac.uk/projects/outputs/personal-health-record-phr-landscape-review> (accessed 3 Sep 2018).

- 1  
2  
3  
4  
5  
6  
7  
8  
9  
10  
11  
12  
13  
14  
15  
16  
17  
18  
19  
20  
21  
22  
23  
24  
25  
26  
27  
28  
29  
30  
31  
32  
33  
34  
35  
36  
37  
38  
39  
40  
41  
42  
43  
44  
45  
46  
47  
48  
49  
50  
51  
52  
53  
54  
55  
56  
57  
58  
59  
60
- <sup>7</sup> NHS statistics, facts and figures. *Nhsconfed.org*. 2017. <http://www.nhsconfed.org/resources/key-statistics-on-the-nhs> (accessed 3 Sep 2018).
- <sup>8</sup> Benson T. Principles of health interoperability HL7 and SNOMED. 2nd ed. London: : Springer 2012.
- <sup>9</sup> Farenden J, Singh I. Local Health and Care Record Exemplars: A summary. *NHS England*. 2018. <https://www.england.nhs.uk/wp-content/uploads/2018/05/local-health-and-care-record-exemplars-summary.pdf>
- <sup>10</sup> Personal communication
- <sup>11</sup> £37.5m investment in Digital Innovation Hubs to tackle Britain’s biggest health challenges - Health Data Research UK. *HDR UK*. 2018. <https://www.hdr.uk/news/37-5m-investment-in-digital-innovation-hubs/> (accessed 26 Nov 2018).
- <sup>12</sup> National Record Locator Service - Health Developer Network. *Health Developer Network*. 2018. <https://developer.nhs.uk/library/systems/national-record-locator-service/> (accessed 3 Sep 2018).
- <sup>13</sup> NHS App - NHS Digital. *NHS Digital*. 2018. <https://digital.nhs.uk/services/nhs-app> (accessed 26 Nov 2018).
- <sup>14</sup> Patient Access – GP services at your fingertips. *EMIS Health*. 2018. <https://www.emishealth.com/products/patient-access/> (accessed 26 Nov 2018).
- <sup>15</sup> Patient portal software – About us – Patients Know Best. *Patients Know Best*. 2018. <https://www.patientsknowbest.com/about-us.html> (accessed 26 Nov 2018).
- <sup>16</sup> Who Evergreen Life are & our mission for people powered health. *Evergreen Life*. 2018. <https://www.evergreen-life.co.uk/who-we-are> (accessed 26 Nov 2018).
- <sup>17</sup> Beard L, Schein R, Morra D, Wilson K, Keelan J. The challenges in making electronic health records accessible to patients. *Journal of the American Medical Informatics Association*. 2011 Nov 25;19(1):116-20.
- <sup>18</sup> Guidance for developing Personal Health Records - NHS Digital. *NHS Digital*. 2018. <https://digital.nhs.uk/services/personal-health-records-adoption-toolkit/guidance-for-developing-personal-health-records> (accessed 3 Sep 2018).
- <sup>19</sup> Open Standards principles. *GOV.UK*. 2018. <https://www.gov.uk/government/publications/open-standards-principles/open-standards-principles> (accessed 3 Sep 2018).

1  
2  
3  
4  
5  
6  
7  
8  
9  
10  
11  
12  
13  
14  
15  
16  
17  
18  
19  
20  
21  
22  
23  
24  
25  
26  
27  
28  
29  
30  
31  
32  
33  
34  
35  
36  
37  
38  
39  
40  
41

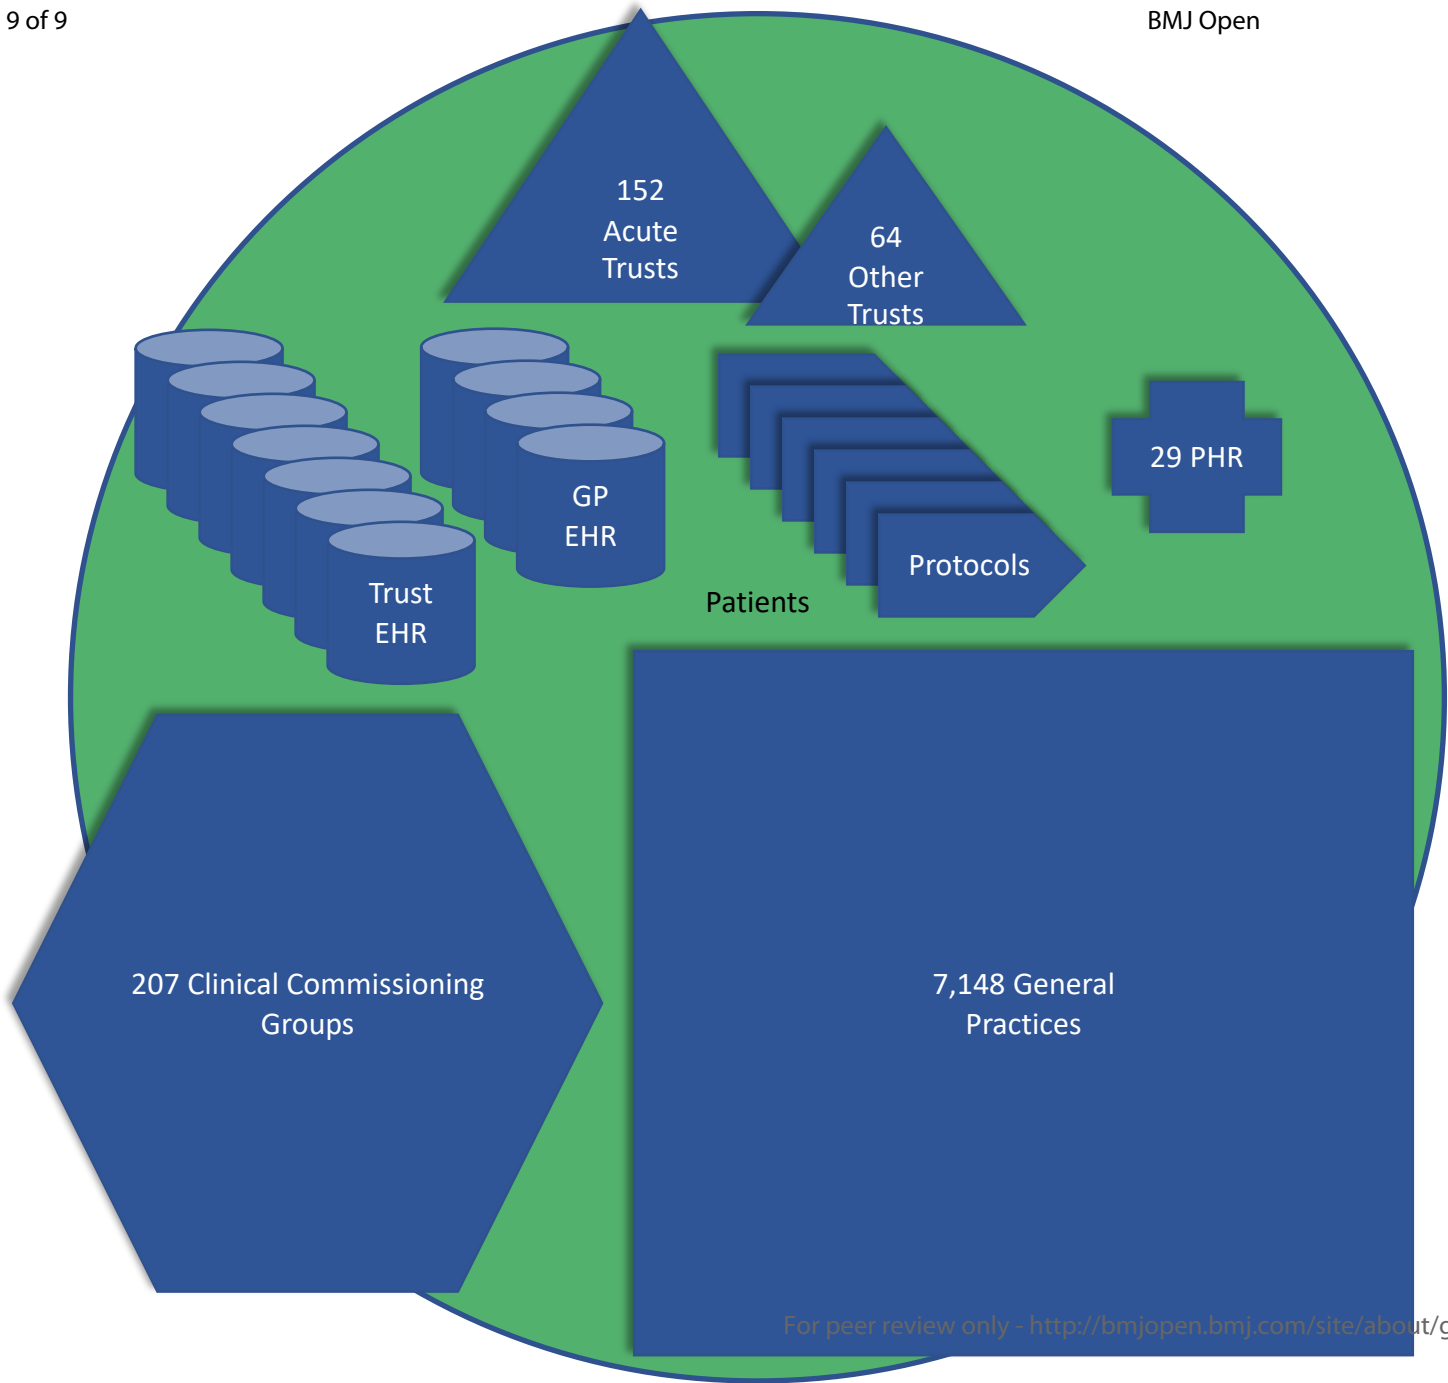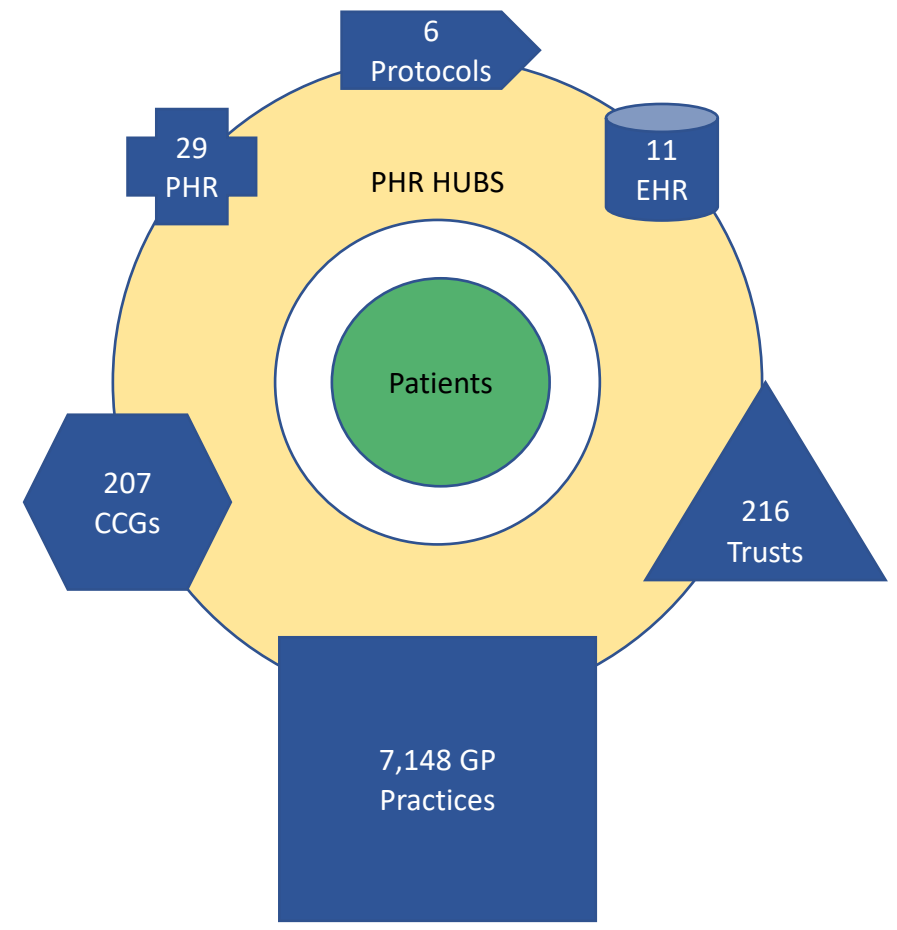

# BMJ Open

## From EHR to PHR: Let's Get the UK Record Straight

|                                 |                                                                                                                                                                                                                                                                                               |
|---------------------------------|-----------------------------------------------------------------------------------------------------------------------------------------------------------------------------------------------------------------------------------------------------------------------------------------------|
| Journal:                        | <i>BMJ Open</i>                                                                                                                                                                                                                                                                               |
| Manuscript ID                   | bmjopen-2019-029582.R2                                                                                                                                                                                                                                                                        |
| Article Type:                   | Communication                                                                                                                                                                                                                                                                                 |
| Date Submitted by the Author:   | 09-May-2019                                                                                                                                                                                                                                                                                   |
| Complete List of Authors:       | Symons, Joshua D; Imperial College London, Department of Surgery & Cancer<br>Ashrafian, Hutan; Imperial College London, Department of Surgery & Cancer;<br>Duncombe, Rachel; Salford Royal NHS Foundation Trust<br>Darzi, Ara; Imperial College London, Institute of Global Health Innovation |
| <b>Primary Subject Heading</b>: | Patient-centred medicine                                                                                                                                                                                                                                                                      |
| Secondary Subject Heading:      | Public health                                                                                                                                                                                                                                                                                 |
| Keywords:                       | Patient Health Record, Electronic Health Record, Patient Empowerment, Digital, Digital Health                                                                                                                                                                                                 |
|                                 |                                                                                                                                                                                                                                                                                               |

SCHOLARONE™  
Manuscripts

## From EHR to PHR: Let's Get the UK Record Straight

Joshua Symons<sup>a</sup>, Hutan Ashrafian<sup>b</sup>, Rachel Dunscombe<sup>c</sup>, Ara Darzi<sup>d</sup>

<sup>a</sup> Director, Big Data & Analytical Unit (BDAU), Centre for Health Policy (CHP), Institute of Global Health Innovation (IGHI), Imperial College London

<sup>b</sup> Chief Scientific Adviser and Honorary Senior Clinical Fellow in Surgery, Institute of Global Health Innovation (IGHI), Imperial College London

<sup>c</sup> Group Director of Digital and Chief Information Officer, Salford Royal NHS Foundation Trust and Northern Care Alliance

<sup>d</sup> Director, Institute of Global Health Innovation (IGHI), Imperial College London

Corresponding author – Hutan Ashrafian (h.ashrafian@imperial.ac.uk)

Institute of Global Health Innovation

10th Floor QEQM (Queen Elizabeth the Queen Mother) Building

St Mary's Hospital Campus

Praed Street, W2 1NY

London, UK

## Abstract

This article reflects on the changing nature of health information access and the transition of focus from electronic health records (EHRs) to personal health records (PHRs) along with the challenges and need for alignment of national initiatives for EHR and PHR in the National Health Service (NHS) of the United Kingdom (UK).

The importance of implementing integrated EHRs as a route to enhance the quality of health delivery has been increasingly understood. EHRs however carry several limitations that include major fragmentation through multiple providers and protocols throughout the NHS. Questions over ownership and control of data further complicate the potential for fully utilising records. Analysing the previous initiatives and the current landscape, we identify that adopting a patient health record system can empower patients and allow better harmonisation of clinical data at a national level. We propose regional PHR “hubs” to provide a universal interface that integrates digital health data at a regional level with further integration at a national level.

We propose that these PHR “hubs” will reduce the complexity of connections, decrease governance challenges and interoperability issues while also providing a safe platform for high-quality scalable and sustainable digital solutions, including artificial intelligence (AI) across the UK NHS, serving as an exemplar for other countries which wish to realise the full value of healthcare records.

## Background

The importance of implementing integrated EHR, increasingly referred to as electronic patient records (EPRs), as a route to enhance the quality of health delivery in the UK NHS were outlined as early as 1998.<sup>1</sup> The benefits of universal access for patients, clinicians, researchers, policy makers and administrators include (i) increasing confidence and convenience through streamlined access to information, (ii) improving clinical outcomes through enhanced care communication, (iii) better science and decision making through access to real-time evidence and (iv) enabling planning and productivity gains through increased efficiency.<sup>1</sup> In 2014, it was proposed that by March of 2018, all individuals should have both viewing and editing capabilities for their own health record.<sup>2</sup> This proposal aligns with the definition of a personal health record (PHR) by the Royal College of Physicians as “digital tools that allow a citizen to interact with health and social care services, have access to the clinical content in their record, capture, record and if they wish, share their own data with clinicians and others”.<sup>3</sup> PHRs therefore provide an integral part of health record integration that is not currently provided by EHR systems alone. Furthermore, PHRs have been shown to contribute to health awareness and could be key in empowering patients to take direct control of their own healthcare.<sup>4</sup> However, despite widespread availability of multiple PHR solutions in the UK, 2018 has now passed without substantial adoption of PHRs and empowerment of patients through meaningful interaction with their own healthcare data.

Although there has been growth in the number of PHR providers in almost all regions of the UK, PHR uptake by patients and organisations is still remarkably slow.<sup>5</sup> In response to a survey in 2016, less than 500,000 people were individually registered users of PHR while 1,377 organisations, including 122 NHS Trusts, 16 Clinical Commissioning Groups (CCGs), 1,184 General Practice Surgeries (GPs), 33+ local authorities, 15+ social care providers and 7 health boards were listed as organisational users of PHR.<sup>6</sup> However, it is not clear if single organisations have integrated with multiple PHR providers thereby conflating the totals and making them appear larger than they are, e.g. counts reflecting that nearly half of all NHS Trusts are organisational users.<sup>6</sup> Slow uptake has been attributed to barriers in (i) sharing of data at a local level, (ii) clinical aversion and reluctance, (iii) patient awareness and (iv) technical integration with local information systems.<sup>6</sup> Despite improvements in data sharing mandates, namely through the Caldicott principles, the first challenge remains heavily influenced by the second and third challenges as sharing of data is inhibited where there is a lack of clinician and patient endorsement.<sup>6</sup> Furthermore, PHR solutions have the ability to address the first 3 challenges through patient control of records and bringing value for clinicians and patients yet this ability is hampered by the formidable challenge of local integration. Given that the majority of existing UK PHR solutions are reliant on direct integration with existing EHR solutions, local information exchange remains a key inhibitor to gaining value from PHRs.<sup>6</sup>

Despite a large amount of research in EHR interoperability, there is a paucity of evidence regarding barriers for EHR integration with PHR, i.e. PHR interoperability. The prospect of universally connecting PHR systems is daunting considering the sheer number of individual CCGs, NHS Trusts, GPs, PHR and EHR vendors and exchange protocols (**Table 1 and Figure 1**). Established node connection formulae demonstrates that 8,500 organisations could require over 36 million individual connections to provide real-time connectivity of records for patients at any location.<sup>7,8</sup> This doesn't take into account additional organisations such as laboratories, social and community care. Further addition of PHR providers, personal devices and applications will exponentially increase this complexity. Solutions have been proposed to deal with some of this complexity as part of national programmes but these fall short of

implementing the benefits of PHR. Therefore, both technical and socio-technical barriers for information exchange between health record systems continue to present the biggest barrier for enabling these benefits.

| Type                | Count                                                                                                                                                                                                                                    |
|---------------------|------------------------------------------------------------------------------------------------------------------------------------------------------------------------------------------------------------------------------------------|
| Care organisations  | (207) CCGs<br>(152) acute specialist and non-specialists trusts<br>(54) mental health trusts<br>(35) community providers<br>(10) ambulance trusts<br>(853) for-profit and not-for-profit independent sector organisations<br>(7,148) GPs |
| PHR providers       | (29) independent providers recorded by RCP                                                                                                                                                                                               |
| GP EHR providers    | (4) EMIS, TPP, INPS, Microtest                                                                                                                                                                                                           |
| Trust EHR providers | (7) Allscripts, Cerner, Epic, Intersystems, Lorenzo, Meditech, OpenEHR                                                                                                                                                                   |
| Exchange protocols  | (6) HL7, FHIR, IHE, CDA, XDS, DICOM                                                                                                                                                                                                      |

**Table 1** Examples of different care providers, PHR and EHR providers and exchange protocols used within the UK. List is non-exhaustive.

### Reducing Barriers for Information Exchange

Local Health and Care Record Exemplars (LHCREs) have been created in the NHS with the same proposed benefits outlined in 1998 through integration of care records, such as primary care with secondary, mental health and social at a regional level.<sup>9</sup> Although LHCREs aim to achieve real-time data sharing of both identifiable and de-personalised data for direct care, the scope of these integrated records does not universally include provision of linked data for research or patient access to read and write to integrated records.<sup>9</sup> Approaches to governance of data in LHCRE are not universal, with some initiatives putting control of research and sharing permission with GPs and Academic Health Science Networks (AHSNs) while others form independent research advisory groups. Some LHCREs are implementing PHR repositories at a regional level but this is not universal and different LHCREs are embracing different technologies.<sup>10</sup> This creates regional variation in data sharing practices, record access and approved uses of data. Furthermore, resources are limited, with some LHCRE funding only covering £7.5 million of the estimated £90 million 5 year cost, making non-critical features difficult to justify.<sup>10</sup> This raises important questions around sustainability of LHRCEs which have yet to be answered. Therefore, although LHCRE may provide integration of records to improve direct care, patients will not necessarily benefit from access to these records, researchers may not be able to utilise these linked records to produce evidence and industry may not have access to the benefits of real-time data access to develop new digital interventions. Digital innovation hubs, funded through Health Data Research UK (HDR UK) and aiming to increase research using local integrated records, will go some way in addressing use of LHCRE data for innovative research but will not provide patient access or data input into these records.<sup>11</sup>

At a national level, the National Record Locator Service (NRLS), not to be confused with the same abbreviation used for the National Reporting and Learning System, has been proposed to achieve harmonisation of individual health records across the U.K.<sup>12</sup> This will be achieved by connecting NRLS to various electronic patient master index (EPMI) systems at care providers which will keep care records up to date. Although this important service will aim to provide a pointer to a single source of truth record



1  
2  
3 for each patient, it will not guarantee the quality of that record or provide integration of records for  
4 non-clinical sources of patient data. The proof of concept for the service will also not include retrieval of  
5 the actual patient records and early features are aimed at providing access for direct care, therefore this  
6 service will not be able to provide real-time access to patient records at a national level.<sup>12</sup> NRLS in its  
7 current iteration, will require that care provider services will be always available for querying using a pull  
8 method, but services may not be available resulting in limited access to required records. Connectivity  
9 to records at a national level will be dependent on the quality of local EPMI and EHR systems. Such  
10 connectivity issues could result in patient safety incidents due to missing records. Furthermore there is a  
11 need to consider other sources of data relevant to personal health such as income, education and other  
12 data which patients may be able to share easily given the right mechanism. This has given rise in “smart  
13 cities” to the concept of a person master index (PMI) as an alternative to an EPMI.  
14  
15  
16

17 The newly released *NHS App* will allow patients to check symptoms, book GP appointments, manage  
18 repeat prescriptions, view their own primary care record and manage data sharing preferences.<sup>13</sup> These  
19 features are enabled through a “broker” system which translates individual health record provider  
20 implementations.<sup>14</sup> Although this mobile application will create an excellent baseline entry point for  
21 every NHS patient to view their GP records, it does not include any ability to edit or even view the entire  
22 patient record. Other features will allow patients to interact with portions of the health and social care  
23 system but listed benefits indicate that this tool will provide a passive consumption service for  
24 commissioned digital services, not allow patients to integrate digital services they have already chosen.  
25 Despite improving access to NHS services and providing a starting point for universal primary care  
26 record access, the NHS application in its current form will not provide a full universal PHR solution in its  
27 initial form and will overlap with functionality provided by existing EHR portals and PHR platforms.<sup>15 16 17</sup>  
28 Although the NHS App cannot replicate existing PHR solutions and may not be designed to replace them  
29 it is unclear at this time how the release of this application might impact the ability of PHR providers to  
30 market their products and services. It is also unclear on how patient opt-out for data sharing in the NHS  
31 App will impact data sharing at a regional level as patients might believe that using the application to  
32 opt-out of data sharing will stop any sharing of their data in any system, resulting in a lack of clarity and  
33 transparency for patients and organisations alike with potential loss of trust across all stakeholders.  
34  
35  
36  
37

38 PHR which enables full two-way integration of both care provider health record data and patient  
39 generated data with patient control of data sharing, is the only current proposed health record solution  
40 which provides a choice to patients for inputting into and controlling their own health records. PHRs also  
41 provide benefit by providing digital intervention data generated by patients to clinicians as well as  
42 providing a missing piece of research data necessary to evaluate the true patient journey. Current PHR  
43 provider models are mainly centred on integrating with local EHR systems at a care provider level, which  
44 has been shown to be more beneficial than standalone PHR systems, although both models have been  
45 reported as offering healthcare benefits.<sup>6</sup> Although this meets the criteria of providing patients access, it  
46 does not provide patients a choice in features of different PHR providers or join data across multiple  
47 providers. Integration is also done using bespoke interoperability with local providers one solution at a  
48 time. To provide choice in PHR features, integration with multiple PHR providers is required by single  
49 institutions. This increases the burden and cost to these institutions to provide multiple PHR solutions  
50 and makes universal adoption of PHR more difficult as patients and clinicians are unable to determine  
51 what benefit different PHR solutions may provide. Stand-alone PHR systems which enable patient input  
52 will not necessarily be integrated with PMI systems and therefore data from these systems will not be  
53  
54  
55  
56  
57  
58  
59  
60

1  
2  
3 available to NRLS, making the patient responsible for communicating relevant information to clinicians  
4 and exacerbating the existing burden for patients.  
5

### 6 **Learning from the Past**

7  
8 The dangers of trying to individually connect EHRs nationally and regionally while simultaneously  
9 increasing adoption of PHR with the current system structure are substantial. This could lead to record  
10 fragmentation which is an established concern and possibly lock data into another silo, unavailable to  
11 the persons or systems which need it.<sup>18</sup> Additionally, there could be an increasing disparity between the  
12 information patients think is available to carers compared to what exists at the point of care. NRLS  
13 would need to connect to more systems with less certainty over the range of standards which will be  
14 required to locate records. Although the PHR adoption toolkit provides guidance for most standards,  
15 implementation of these interoperability standards will inevitably vary.<sup>19</sup> Currently there is also no  
16 solution for universal integration of personal device data into most EHR systems. Some PHR systems  
17 provide this functionality, but monitoring of digital interventions such as prescribed mobile applications  
18 will not be possible where personal device data is not being integrated back into clinical records. As  
19 suggested in a 2018 REFORM report on data value, integration of such data should be explicitly included  
20 in NHS procurement contracts to ensure that digital interventions can be tested for safety and efficacy.<sup>20</sup>  
21 Furthermore, the benefits of integrating patient generated data into clinical records have been clearly  
22 outlined in the Topol review.<sup>21</sup> Universal integration of this form of patient data into clinical records will  
23 be a large challenge for any EHR provider.  
24  
25  
26  
27

### 28 **A Potential Solution**

29  
30 To overcome the barriers of universal record integration and PHR adoption, we propose a new model of  
31 connecting systems with a PHR “hub” providing integration at regional levels for a single ‘source of  
32 truth’ PHR (**Figure 1**). The PHR hub could operate in a similar fashion to the “broker” system used by the  
33 *NHS App* to communicate with different implementations of GP systems, translating data across EHR  
34 and PHR providers thereby reducing complexity immensely while simultaneously moving towards  
35 universal choice and control for patients. Complexity, barriers to interoperability and the potential for  
36 vendor lock-in would be further reduced by requiring open standards in the PHR hub.<sup>22</sup> Such an initiative  
37 would naturally complement existing LHCREs, especially if implemented at a regional level, reducing  
38 variability for LHCRE implementation and enabling LHCREs to focus on critical record integration.  
39 Combining this with patient controlled PHRs would decrease governance burden for organisations as  
40 patients themselves would control records or be able to delegate this to care providers as needed.  
41 Furthermore, each regional PHR would facilitate universal record validity by bridging local patient  
42 master index (PMI) systems to keep patient details up to date. This would then ease requirements for  
43 the National Record Locator Service (NRLS).<sup>12</sup> PHR hubs could also separate care record service from  
44 care settings allowing for better security and easier data migrations. PHR hubs would provide a single  
45 integration point between multiple PHR and EHR providers taking away the burden of integration from  
46 the care provider. Finally, universal PHR accessibility would allow PHR vendors to market directly to  
47 patients supported by clinician conversations around the benefits, possibly providing a far more efficient  
48 method of increasing patient adoption and providing an easier path to self-care.  
49  
50  
51  
52  
53  
54  
55  
56  
57  
58  
59

## Conclusion

The ambition of achieving the potential of PHRs has long been established. There have been major achievements towards understanding value of increased information flow, especially for patients, based on recommendations of the Wachter report.<sup>23</sup> This includes the appointment of Clinical Chief Information Officers across the NHS, the launch of the NHS App and new training initiatives such as the NHS Digital Academy.<sup>24</sup> Despite these achievements, barriers such as a lack of EHR systems, lack of PHR functionality in existing EHR systems, the controversial legacy of top-down implementations such as the costly UK National Programme for Information Technology (NPfIT) and continuous interoperability issues have presented formidable opponents to this ambition.<sup>24</sup> Enabling true patient empowerment requires that organisations are able to universally connect to PHR providers and that patients are able to select the PHR provider they prefer. Understanding and addressing facilitators and barriers of PHR adoption along with barriers for PHR interoperability should be a key focus for the NHS and researchers. Only where PHR adoption is driven by patients will PHR access fully satisfy the requirements of its intended users. This requires facilitating a market place for PHR providers who can address patient demand using their own data. We have proposed a new call for regional PHR hubs to provide an universal PHR interface and integrate EHR systems using the existing broker system already provided by the NHS App as an example.<sup>10</sup> As suggested in the Watcher report, we propose that such hubs should be implemented in regional settings to encourage local ownership.<sup>23</sup> This will reduce the complexity of connections, decrease governance challenges and interoperability issues while also providing a safe platform for high-quality scalable and sustainable digital solutions, including AI, across the NHS. Achieving standardised universal PHR adoption with EHR data in an integrated record in the NHS will unlock the true value of the UK's integrated healthcare records and can serve as an example to other countries which wish to unlock the true potential of their healthcare records.

### Figure Legend:

Figure 1- PHR hubs would transform the complex ecosystem (left) including high patient and provider burden to a simpler ecosystem (right) centred around the patient increasing choice and system flexibility

### Author contributions:

JS – Conception, Design, Final Draft, Approval and Agreement to be Accountable

HA– Conception, Design, Final Draft, Approval and Agreement to be Accountable

RD–Design, Final Draft, Approval and Agreement to be Accountable

AD–Design, Final Draft, Approval and Agreement to be Accountable

1  
2  
3 Funding Statement: Infrastructure support for this research was provided by the NIHR Imperial  
4 Biomedical Research Centre (BRC).  
5  
6  
7

8 Conflicts of Interest: None  
9  
10

## 11 References

- 12  
13  
14 <sup>1</sup> NHS Executive. Information for health: an information strategy for the modern NHS 1998-2005.  
15 Department of Health 1998.  
16 [http://webarchive.nationalarchives.gov.uk/20120503231618/http://www.dh.gov.uk/prod\\_consum\\_dh/](http://webarchive.nationalarchives.gov.uk/20120503231618/http://www.dh.gov.uk/prod_consum_dh/groups/dh_digitalassets/@dh/@en/documents/digitalasset/dh_4014469.pdf)  
17 [groups/dh\\_digitalassets/@dh/@en/documents/digitalasset/dh\\_4014469.pdf](http://webarchive.nationalarchives.gov.uk/20120503231618/http://www.dh.gov.uk/prod_consum_dh/groups/dh_digitalassets/@dh/@en/documents/digitalasset/dh_4014469.pdf)  
18  
19 <sup>2</sup> Kelsey T, Cavendish W. Personalised Health and Care 2020: Using Data and Technology to Transform  
20 Outcomes for Patients and Citizens. National Information Board 2014.  
21 [https://assets.publishing.service.gov.uk/government/uploads/system/uploads/attachment\\_data/file/38](https://assets.publishing.service.gov.uk/government/uploads/system/uploads/attachment_data/file/384650/NIB_Report.pdf)  
22 [4650/NIB\\_Report.pdf](https://assets.publishing.service.gov.uk/government/uploads/system/uploads/attachment_data/file/384650/NIB_Report.pdf)  
23  
24 <sup>3</sup> Wyatt J, Hoogewerf J, Quinn N. Personal health record (PHR) User insights. *RCP* 2017.  
25 <https://www.rcplondon.ac.uk/projects/outputs/personal-health-record-phr-user-insights> (accessed 3  
26 Sep 2018).  
27  
28 <sup>4</sup> Ozok AA, Wu H, Garrido M, Pronovost PJ, Gurses AP. Usability and perceived usefulness of personal  
29 health records for preventive health care: A case study focusing on patients' and primary care providers'  
30 perspectives. *Applied ergonomics*. 2014 May 1;45(3):613-28.  
31  
32 <sup>5</sup> PHR locations map - NHS Digital. NHS Digital. 2018. [https://digital.nhs.uk/services/personal-health-](https://digital.nhs.uk/services/personal-health-records-adoption-toolkit/phr-locations-map)  
33 [records-adoption-toolkit/phr-locations-map](https://digital.nhs.uk/services/personal-health-records-adoption-toolkit/phr-locations-map) (accessed 3 Sep 2018).  
34  
35 <sup>6</sup> Wyatt J, Sathanandam S, Rastall P. Personal health record (PHR) landscape review Final report. *RCP*  
36 2016. <https://www.rcplondon.ac.uk/projects/outputs/personal-health-record-phr-landscape-review>  
37 (accessed 3 Sep 2018).  
38  
39 <sup>7</sup> NHS statistics, facts and figures. *Nhsconfed.org*. 2017. [http://www.nhsconfed.org/resources/key-](http://www.nhsconfed.org/resources/key-statistics-on-the-nhs)  
40 [statistics-on-the-nhs](http://www.nhsconfed.org/resources/key-statistics-on-the-nhs) (accessed 3 Sep 2018).  
41  
42 <sup>8</sup> Benson T. Principles of health interoperability HL7 and SNOMED. 2nd ed. London: : Springer 2012.  
43  
44 <sup>9</sup> Farenden J, Singh I. Local Health and Care Record Exemplars: A summary. *NHS England*. 2018.  
45 [https://www.england.nhs.uk/wp-content/uploads/2018/05/local-health-and-care-record-exemplars-](https://www.england.nhs.uk/wp-content/uploads/2018/05/local-health-and-care-record-exemplars-summary.pdf)  
46 [summary.pdf](https://www.england.nhs.uk/wp-content/uploads/2018/05/local-health-and-care-record-exemplars-summary.pdf)  
47  
48 <sup>10</sup> Personal communication  
49  
50 <sup>11</sup> £37.5m investment in Digital Innovation Hubs to tackle Britain's biggest health challenges - Health  
51 Data Research UK. *HDR UK*. 2018. [https://www.hdruk.ac.uk/news/37-5m-investment-in-digital-](https://www.hdruk.ac.uk/news/37-5m-investment-in-digital-innovation-hubs/)  
52 [innovation-hubs/](https://www.hdruk.ac.uk/news/37-5m-investment-in-digital-innovation-hubs/) (accessed 26 Nov 2018).  
53  
54  
55  
56  
57  
58  
59  
60

- 1  
2  
3  
4  
5  
6  
7  
8  
9  
10  
11  
12  
13  
14  
15  
16  
17  
18  
19  
20  
21  
22  
23  
24  
25  
26  
27  
28  
29  
30  
31  
32  
33  
34  
35  
36  
37  
38  
39  
40  
41  
42  
43  
44  
45  
46  
47  
48  
49  
50  
51  
52  
53  
54  
55  
56  
57  
58  
59  
60
- <sup>12</sup> National Record Locator Service - Health Developer Network. *Health Developer Network*. 2018. <https://developer.nhs.uk/library/systems/national-record-locator-service/> (accessed 3 Sep 2018).
- <sup>13</sup> NHS App - NHS Digital. *NHS Digital*. 2018. <https://digital.nhs.uk/services/nhs-app> (accessed 26 Nov 2018).
- <sup>14</sup> NHS Digital. Personal communication. 24 Apr 2019.
- <sup>15</sup> Patient Access – GP services at your fingertips. *EMIS Health*. 2018. <https://www.emishealth.com/products/patient-access/> (accessed 26 Nov 2018).
- <sup>16</sup> Patient portal software – About us – Patients Know Best. *Patients Know Best*. 2018. <https://www.patientsknowbest.com/about-us.html> (accessed 26 Nov 2018).
- <sup>17</sup> Who Evergreen Life are & our mission for people powered health. *Evergreen Life*. 2018. <https://www.evergreen-life.co.uk/who-we-are> (accessed 26 Nov 2018).
- <sup>18</sup> Beard L, Schein R, Morra D, Wilson K, Keelan J. The challenges in making electronic health records accessible to patients. *Journal of the American Medical Informatics Association*. 2011 Nov 25;19(1):116-20.
- <sup>19</sup> Guidance for developing Personal Health Records - NHS Digital. *NHS Digital*. 2018. <https://digital.nhs.uk/services/personal-health-records-adoption-toolkit/guidance-for-developing-personal-health-records> (accessed 3 Sep 2018).
- <sup>20</sup> Harwich, E. and Lasko-Skinner, R., 2018. Making NHS data work for everyone.
- <sup>21</sup> Topol E, Health Education England. The Topol Review. Preparing the Healthcare Workforce to Deliver the Digital Future. Health Education England, editor. London, United Kingdom: NHS. 2018:1-48.
- <sup>22</sup> Open Standards principles. *GOV.UK*. 2018. <https://www.gov.uk/government/publications/open-standards-principles/open-standards-principles> (accessed 3 Sep 2018).
- <sup>23</sup> Wachter R. Making IT work: harnessing the power of health information technology to improve care in England. Report to the National Advisory Group on Health Information Technology in England. London: The Stationery Office. 2016 Sep 7.
- <sup>24</sup> Public Accounts Committee. The dismantled National Programme for IT in the NHS. Nineteenth Report of the Session. 2013;14.

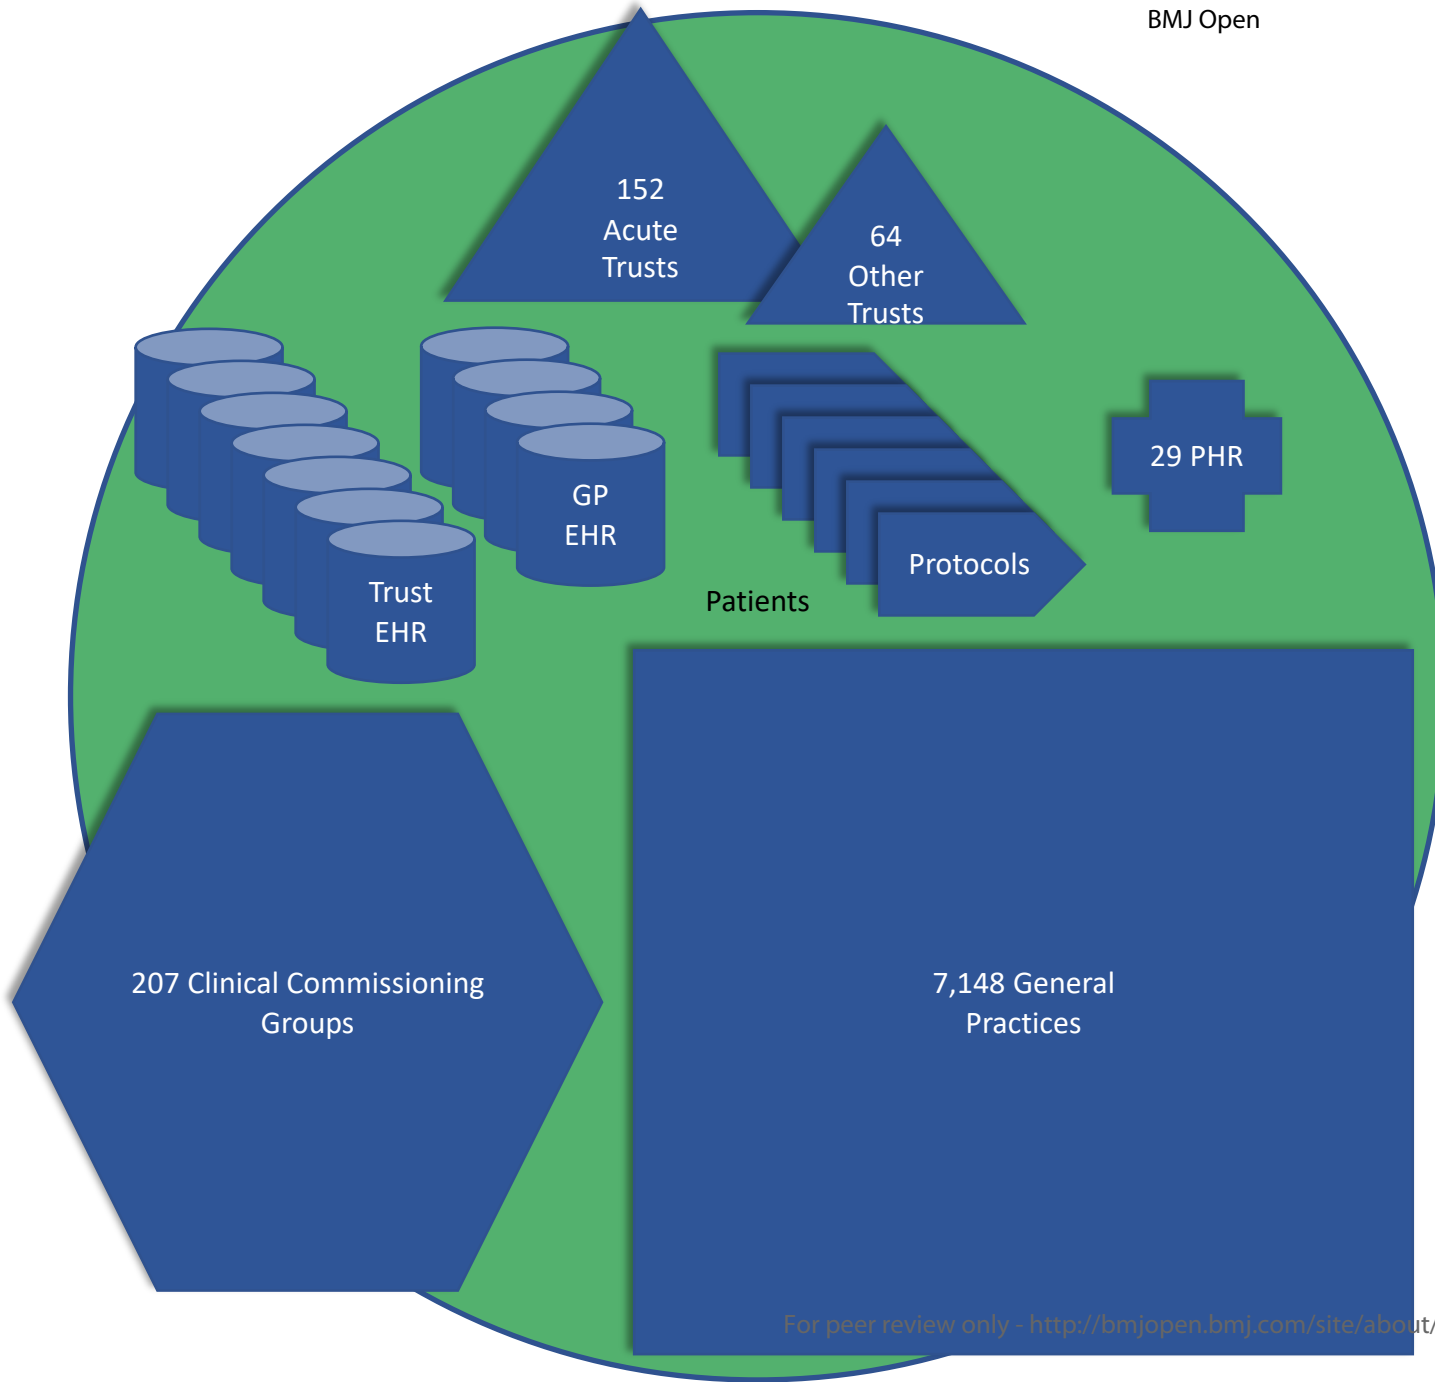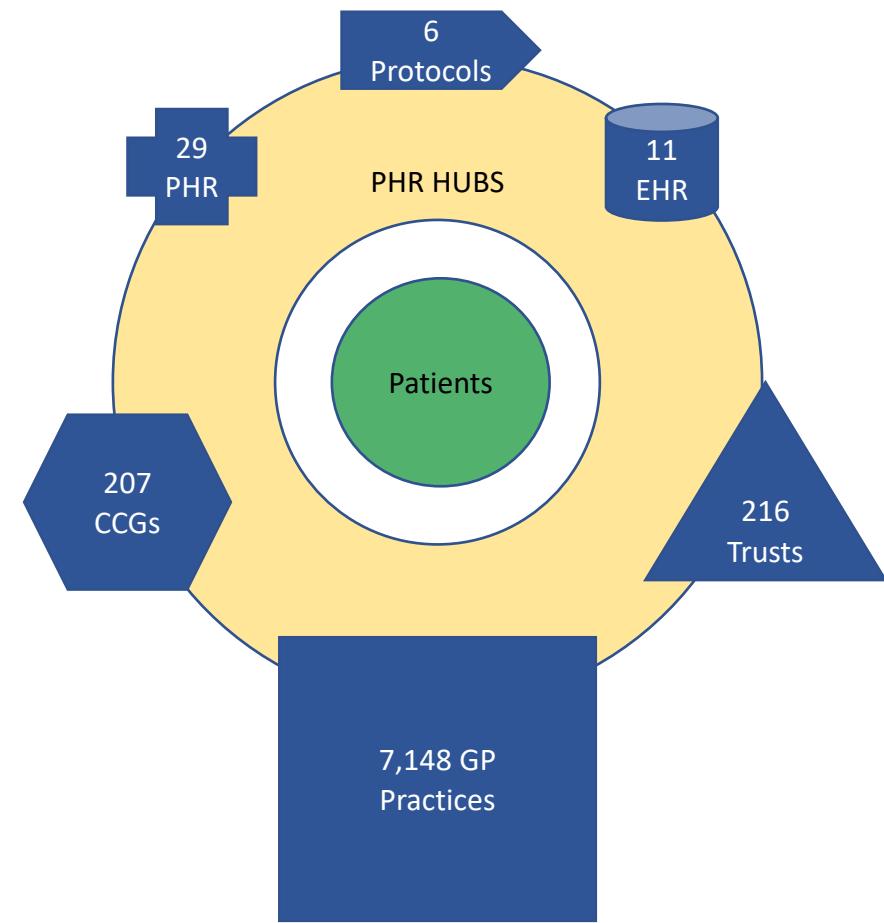

1  
2  
3  
4  
5  
6  
7  
8  
9  
10  
11  
12  
13  
14  
15  
16  
17  
18  
19  
20  
21  
22  
23  
24  
25  
26  
27  
28  
29  
30  
31  
32  
33  
34  
35  
36  
37  
38  
39  
40  
41

# BMJ Open

## From EHR to PHR: Let's Get the UK Record Straight

|                                 |                                                                                                                                                                                                                                                                                               |
|---------------------------------|-----------------------------------------------------------------------------------------------------------------------------------------------------------------------------------------------------------------------------------------------------------------------------------------------|
| Journal:                        | <i>BMJ Open</i>                                                                                                                                                                                                                                                                               |
| Manuscript ID                   | bmjopen-2019-029582.R3                                                                                                                                                                                                                                                                        |
| Article Type:                   | Communication                                                                                                                                                                                                                                                                                 |
| Date Submitted by the Author:   | 12-Aug-2019                                                                                                                                                                                                                                                                                   |
| Complete List of Authors:       | Symons, Joshua D; Imperial College London, Department of Surgery & Cancer<br>Ashrafian, Hutan; Imperial College London, Department of Surgery & Cancer;<br>Duncombe, Rachel; Salford Royal NHS Foundation Trust<br>Darzi, Ara; Imperial College London, Institute of Global Health Innovation |
| <b>Primary Subject Heading</b>: | Patient-centred medicine                                                                                                                                                                                                                                                                      |
| Secondary Subject Heading:      | Public health                                                                                                                                                                                                                                                                                 |
| Keywords:                       | Patient Health Record, Electronic Health Record, Patient Empowerment, Digital, Digital Health                                                                                                                                                                                                 |
|                                 |                                                                                                                                                                                                                                                                                               |

SCHOLARONE™  
Manuscripts

## From EHR to PHR: Let's Get the UK Record Straight

Joshua Symons<sup>a</sup>, Hutan Ashrafian<sup>b</sup>, Rachel Dunscombe<sup>c</sup>, Ara Darzi<sup>d</sup>

<sup>a</sup> Director, Big Data & Analytical Unit (BDAU), Centre for Health Policy (CHP), Institute of Global Health Innovation (IGHI), Imperial College London

<sup>b</sup> Chief Scientific Adviser and Honorary Senior Clinical Fellow in Surgery, Institute of Global Health Innovation (IGHI), Imperial College London

<sup>c</sup> Group Director of Digital and Chief Information Officer, Salford Royal NHS Foundation Trust and Northern Care Alliance

<sup>d</sup> Director, Institute of Global Health Innovation (IGHI), Imperial College London

Corresponding author – Hutan Ashrafian (h.ashrafian@imperial.ac.uk)

Institute of Global Health Innovation

10th Floor QEQM (Queen Elizabeth the Queen Mother) Building

St Mary's Hospital Campus

Praed Street, W2 1NY

London, UK



## Abstract

This article reflects on the changing nature of health information access and the transition of focus from electronic health records (EHRs) to personal health records (PHRs) along with the challenges and need for alignment of national initiatives for EHR and PHR in the National Health Service (NHS) of the United Kingdom (UK).

The importance of implementing integrated EHRs as a route to enhance the quality of health delivery has been increasingly understood. EHRs however carry several limitations that include major fragmentation through multiple providers and protocols throughout the NHS. Questions over ownership and control of data further complicate the potential for fully utilising records. Analysing the previous initiatives and the current landscape, we identify that adopting a patient health record system can empower patients and allow better harmonisation of clinical data at a national level. We propose regional PHR “hubs” to provide a universal interface that integrates digital health data at a regional level with further integration at a national level.

We propose that these PHR “hubs” will reduce the complexity of connections, decrease governance challenges and interoperability issues while also providing a safe platform for high-quality scalable and sustainable digital solutions, including artificial intelligence (AI) across the UK NHS, serving as an exemplar for other countries which wish to realise the full value of healthcare records.

## Background

The importance of implementing integrated EHR, increasingly referred to as electronic patient records (EPRs), as a route to enhance the quality of health delivery in the UK NHS were outlined as early as 1998.<sup>1</sup> The benefits of universal access for patients, clinicians, researchers, policy makers and administrators include (i) increasing confidence and convenience through streamlined access to information, (ii) improving clinical outcomes through enhanced care communication, (iii) better science and decision making through access to real-time evidence and (iv) enabling planning and productivity gains through increased efficiency.<sup>1</sup> In 2014, it was proposed that by March of 2018, all individuals should have both viewing and editing capabilities for their own health record.<sup>2</sup> This proposal aligns with the definition of a personal health record (PHR) by the Royal College of Physicians as “digital tools that allow a citizen to interact with health and social care services, have access to the clinical content in their record, capture, record and if they wish, share their own data with clinicians and others”.<sup>3</sup> PHRs therefore provide an integral part of health record integration that is not currently provided by EHR systems alone. Furthermore, PHRs have been shown to contribute to health awareness and could be key in empowering patients to take direct control of their own healthcare.<sup>4</sup> However, despite widespread availability of multiple PHR solutions in the UK, 2018 has now passed without substantial adoption of PHRs and empowerment of patients through meaningful interaction with their own healthcare data.

Although there has been growth in the number of PHR providers in almost all regions of the UK, PHR uptake by patients and organisations is still remarkably slow.<sup>5</sup> In response to a survey in 2016, less than 500,000 people were individually registered users of PHR while 1,377 organisations, including 122 NHS Trusts, 16 Clinical Commissioning Groups (CCGs), 1,184 General Practice Surgeries (GPs), 33+ local authorities, 15+ social care providers and 7 health boards were listed as organisational users of PHR.<sup>6</sup> However, it is not clear if single organisations have integrated with multiple PHR providers thereby conflating the totals and making them appear larger than they are, e.g. counts reflecting that nearly half of all NHS Trusts are organisational users.<sup>6</sup> Slow uptake has been attributed to barriers in (i) sharing of data at a local level, (ii) clinical aversion and reluctance, (iii) patient awareness and (iv) technical integration with local information systems.<sup>6</sup> Despite improvements in data sharing mandates, namely through the Caldicott principles, the first challenge remains heavily influenced by the second and third challenges as sharing of data is inhibited where there is a lack of clinician and patient endorsement.<sup>6</sup> Furthermore, PHR solutions have the ability to address the first 3 challenges through patient control of records and bringing value for clinicians and patients yet this ability is hampered by the formidable challenge of local integration. Given that the majority of existing UK PHR solutions are reliant on direct integration with existing EHR solutions, local information exchange remains a key inhibitor to gaining value from PHRs.<sup>6</sup>

Despite a large amount of research in EHR interoperability, there is a paucity of evidence regarding barriers for EHR integration with PHR, i.e. PHR interoperability. The prospect of universally connecting PHR systems is daunting considering the sheer number of individual CCGs, NHS Trusts, GPs, PHR and EHR vendors and exchange protocols (**Table 1 and Figure 1**). Established node connection formulae demonstrates that 8,500 organisations could require over 36 million individual connections to provide real-time connectivity of records for patients at any location.<sup>7,8</sup> This doesn't take into account additional organisations such as laboratories, social and community care. Further addition of PHR providers, personal devices and applications will exponentially increase this complexity. Solutions have been proposed to deal with some of this complexity as part of national programmes but these fall short of

implementing the benefits of PHR. Therefore, both technical and socio-technical barriers for information exchange between health record systems continue to present the biggest barrier for enabling these benefits.

| Type                | Count                                                                                                                                                                                                                                    |
|---------------------|------------------------------------------------------------------------------------------------------------------------------------------------------------------------------------------------------------------------------------------|
| Care organisations  | (207) CCGs<br>(152) acute specialist and non-specialists trusts<br>(54) mental health trusts<br>(35) community providers<br>(10) ambulance trusts<br>(853) for-profit and not-for-profit independent sector organisations<br>(7,148) GPs |
| PHR providers       | (29) independent providers recorded by RCP                                                                                                                                                                                               |
| GP EHR providers    | (4) EMIS, TPP, INPS, Microtest                                                                                                                                                                                                           |
| Trust EHR providers | (7) Allscripts, Cerner, Epic, Intersystems, Lorenzo, Meditech, OpenEHR                                                                                                                                                                   |
| Exchange protocols  | (6) HL7, FHIR, IHE, CDA, XDS, DICOM                                                                                                                                                                                                      |

**Table 1** Examples of different care providers, PHR and EHR providers and exchange protocols used within the UK. List is non-exhaustive.

### Reducing Barriers for Information Exchange

Local Health and Care Record Exemplars (LHCREs) have been created in the NHS with the same proposed benefits outlined in 1998 through integration of care records, such as primary care with secondary, mental health and social at a regional level.<sup>9</sup> Although LHCREs aim to achieve real-time data sharing of both identifiable and de-personalised data for direct care, the scope of these integrated records does not universally include provision of linked data for research or patient access to read and write to integrated records.<sup>9</sup> Approaches to governance of data in LHCRE are not universal, with some initiatives putting control of research and sharing permission with GPs and Academic Health Science Networks (AHSNs) while others form independent research advisory groups. Some LHCREs are implementing PHR repositories at a regional level but this is not universal and different LHCREs are embracing different technologies.<sup>10</sup> This creates regional variation in data sharing practices, record access and approved uses of data. Furthermore, resources are limited, with some LHCRE funding only covering £7.5 million of the estimated £90 million 5 year cost, making non-critical features difficult to justify.<sup>10</sup> This raises important questions around sustainability of LHRCEs which have yet to be answered. Therefore, although LHCRE may provide integration of records to improve direct care, patients will not necessarily benefit from access to these records, researchers may not be able to utilise these linked records to produce evidence and industry may not have access to the benefits of real-time data access to develop new digital interventions. Digital innovation hubs, funded through Health Data Research UK (HDR UK) and aiming to increase research using local integrated records, will go some way in addressing use of LHCRE data for innovative research but will not provide patient access or data input into these records.<sup>11</sup>

At a national level, the National Record Locator Service (NRLS), not to be confused with the same abbreviation used for the National Reporting and Learning System, has been proposed to achieve harmonisation of individual health records across the U.K.<sup>12</sup> This will be achieved by connecting NRLS to various electronic patient master index (EPMI) systems at care providers which will keep care records up to date. Although this important service will aim to provide a pointer to a single source of truth record

1  
2  
3 for each patient, it will not guarantee the quality of that record or provide integration of records for  
4 non-clinical sources of patient data. The proof of concept for the service will also not include retrieval of  
5 the actual patient records and early features are aimed at providing access for direct care, therefore this  
6 service will not be able to provide real-time access to patient records at a national level.<sup>12</sup> NRLS in its  
7 current iteration, will require that care provider services will be always available for querying using a pull  
8 method, but services may not be available resulting in limited access to required records. Connectivity  
9 to records at a national level will be dependent on the quality of local EPMI and EHR systems. Such  
10 connectivity issues could result in patient safety incidents due to missing records. Furthermore there is a  
11 need to consider other sources of data relevant to personal health such as income, education and other  
12 data which patients may be able to share easily given the right mechanism. This has given rise in “smart  
13 cities” to the concept of a person master index (PMI) as an alternative to an EPMI.  
14  
15

16  
17 The newly released *NHS App* will allow patients to check symptoms, book GP appointments, manage  
18 repeat prescriptions, view their own primary care record and manage data sharing preferences.<sup>13</sup> These  
19 features are enabled through a “broker” system which translates individual health record provider  
20 implementations.<sup>14</sup> Although this mobile application will create an excellent baseline entry point for  
21 every NHS patient to view their GP records, it does not include any ability to edit or even view the entire  
22 patient record. Other features will allow patients to interact with portions of the health and social care  
23 system but listed benefits indicate that this tool will provide a passive consumption service for  
24 commissioned digital services, without allowing patients to integrate digital services they have already  
25 chosen. Despite improving access to NHS services and providing a starting point for universal primary  
26 care record access, the NHS application in its current form will not provide a full universal PHR solution  
27 in its initial form and will overlap with functionality provided by existing EHR portals and PHR  
28 platforms.<sup>15 16 17</sup> Although the NHS App cannot replicate existing PHR solutions and may not be designed  
29 to replace them it is unclear at this time how the release of this application might impact the ability of  
30 PHR providers to market their products and services. It is also unclear on how patient opt-out for data  
31 sharing in the NHS App will impact data sharing at a regional level as patients might believe that using  
32 the application to opt-out of data sharing will stop any sharing of their data in any system, resulting in a  
33 lack of clarity and transparency for patients and organisations alike with potential loss of trust across all  
34 stakeholders.  
35  
36  
37  
38

39  
40 PHR which enables full two-way integration of both care provider health record data and patient  
41 generated data with patient control of data sharing, is the only current proposed health record solution  
42 which provides a choice to patients for inputting into and controlling their own health records. PHRs also  
43 provide benefit by providing digital intervention data generated by patients to clinicians as well as  
44 providing a missing piece of research data necessary to evaluate the true patient journey. Current PHR  
45 provider models are mainly centred on integrating with local EHR systems at a care provider level, which  
46 has been shown to be more beneficial than standalone PHR systems, although both models have been  
47 reported as offering healthcare benefits.<sup>6</sup> Although this meets the criteria of providing patients access, it  
48 does not provide patients a choice in features of different PHR providers or join data across multiple  
49 providers. Integration is also done using bespoke interoperability with local providers one solution at a  
50 time. To provide choice in PHR features, integration with multiple PHR providers is required by single  
51 institutions. This increases the burden and cost to these institutions to provide multiple PHR solutions  
52 and makes universal adoption of PHR more difficult as patients and clinicians are unable to determine  
53 what benefit different PHR solutions may provide. Stand-alone PHR systems which enable patient input  
54  
55  
56  
57  
58  
59  
60

1  
2  
3 will not necessarily be integrated with PMI systems and therefore data from these systems will not be  
4 available to NRLS, making the patient responsible for communicating relevant information to clinicians  
5 and exacerbating the existing burden for patients.  
6

### 7 **Learning from the Past**

8  
9 The dangers of trying to individually connect EHRs nationally and regionally while simultaneously  
10 increasing adoption of PHR with the current system structure are substantial. This could lead to record  
11 fragmentation which is an established concern and possibly lock data into another silo, unavailable to  
12 the persons or systems which need it.<sup>18</sup> Additionally, there could be an increasing disparity between the  
13 information patients think is available to providers compared to what exists at the point of care. NRLS  
14 would need to connect to more systems with less certainty over the range of standards which will be  
15 required to locate records. Although the PHR adoption toolkit provides guidance for most standards,  
16 implementation of these interoperability standards will inevitably vary.<sup>19</sup> Currently there is also no  
17 solution for universal integration of personal device data into most EHR systems. Some PHR systems  
18 provide this functionality, but monitoring of digital interventions such as prescribed mobile applications  
19 will not be possible where personal device data is not being integrated back into clinical records. As  
20 suggested in a 2018 REFORM report on data value, integration of such data should be explicitly included  
21 in NHS procurement contracts to ensure that digital interventions can be tested for safety and efficacy.<sup>20</sup>  
22 Furthermore, the benefits of integrating patient generated data into clinical records have been clearly  
23 outlined in the Topol review.<sup>21</sup> Universal integration of this form of patient data into clinical records will  
24 be a large challenge for any EHR provider.  
25  
26  
27  
28

### 29 **A Potential Solution**

30  
31 To overcome the barriers of universal record integration and PHR adoption, we propose a new model of  
32 connecting systems with a PHR “hub” providing integration at regional levels for a single ‘source of  
33 truth’ PHR (**Figure 1**). The PHR hub could operate in a similar fashion to the “broker” system used by the  
34 *NHS App* to communicate with different implementations of GP systems, translating data across EHR  
35 and PHR providers thereby reducing complexity immensely while simultaneously moving towards  
36 universal choice and control for patients. Complexity, barriers to interoperability and the potential for  
37 vendor lock-in would be further reduced by requiring open standards in the PHR hub.<sup>22</sup> Such an initiative  
38 would naturally complement existing LHCREs, especially if surfaced or directly integrated at a regional  
39 level, reducing variability for LHCRE implementation and enabling LHCREs to focus on critical record  
40 integration. Combining this with patient controlled PHRs would decrease governance burden for  
41 organisations as patients themselves would control records or be able to delegate this to care providers  
42 as needed. Furthermore, each regional PHR could facilitate universal patient validated PMI by bridging  
43 local PMI systems to keep patient details up to date. This would then ease requirements for the National  
44 Record Locator Service (NRLS).<sup>12</sup> PHR hubs could also separate care record service from care settings  
45 allowing for better security and easier data migrations. PHR hubs would provide a single integration  
46 point between multiple PHR and EHR providers taking away the burden of integration from the care  
47 provider. Finally, universal PHR accessibility would allow PHR vendors to market directly to patients  
48 supported by clinician conversations around the benefits, possibly providing a far more efficient method  
49 of increasing patient adoption and providing an easier path to self-care.  
50  
51  
52  
53  
54  
55  
56  
57  
58  
59  
60

## Conclusion

The ambition of achieving the potential of PHRs has long been established. There have been major achievements towards understanding value of increased information flow, especially for patients, based on recommendations of the Wachter report.<sup>23</sup> This includes the appointment of Clinical Chief Information Officers across the NHS, the launch of the NHS App and new training initiatives such as the NHS Digital Academy.<sup>24</sup> Despite these achievements, barriers such as a lack of EHR systems, lack of PHR functionality in existing EHR systems, the controversial legacy of top-down implementations such as the costly UK National Programme for Information Technology (NPfIT) and continuous interoperability issues have presented formidable opponents to this ambition.<sup>24</sup> Enabling true patient empowerment requires that organisations are able to universally connect to PHR providers and that patients are able to select the PHR provider they prefer. Understanding and addressing facilitators and barriers of PHR adoption along with barriers for PHR interoperability should be a key focus for the NHS and researchers. Only where PHR adoption is driven by patients will PHR access fully satisfy the requirements of its intended users. This requires facilitating a market place for PHR providers who can address patient demand using their own data. We have proposed a new call for regional PHR hubs to provide an universal PHR interface and integrate EHR systems using the existing broker system already provided by the NHS App as an example.<sup>10</sup> As suggested in the Watcher report, we propose that such hubs should be implemented in regional settings to encourage local ownership.<sup>23</sup> This will reduce the complexity of connections, decrease governance challenges and interoperability issues while also providing a safe platform for high-quality scalable and sustainable digital services, such as personal artificial intelligence (AI), across the NHS. Achieving standardised universal PHR adoption with EHR data in an integrated record in the NHS will unlock the true value of the UK's integrated healthcare records and can serve as an example to other countries which wish to unlock the true potential of their healthcare records.

### Figure Legend:

Figure 1- PHR hubs would transform the complex ecosystem (left) including high patient and provider burden to a simpler ecosystem (right) centred around the patient increasing choice and system flexibility

### Author contributions:

JS – Conception, Design, Final Draft, Approval and Agreement to be Accountable

HA– Conception, Design, Final Draft, Approval and Agreement to be Accountable

RD–Design, Final Draft, Approval and Agreement to be Accountable

AD–Design, Final Draft, Approval and Agreement to be Accountable



1  
2  
3 Funding Statement: Infrastructure support for this research was provided by the NIHR Imperial  
4 Biomedical Research Centre (BRC).  
5  
6  
7

8 Conflicts of Interest: None  
9  
10

## 11 References

- 12  
13  
14 <sup>1</sup> NHS Executive. Information for health: an information strategy for the modern NHS 1998-2005.  
15 Department of Health 1998.  
16 [http://webarchive.nationalarchives.gov.uk/20120503231618/http://www.dh.gov.uk/prod\\_consum\\_dh/](http://webarchive.nationalarchives.gov.uk/20120503231618/http://www.dh.gov.uk/prod_consum_dh/groups/dh_digitalassets/@dh/@en/documents/digitalasset/dh_4014469.pdf)  
17 [groups/dh\\_digitalassets/@dh/@en/documents/digitalasset/dh\\_4014469.pdf](http://webarchive.nationalarchives.gov.uk/20120503231618/http://www.dh.gov.uk/prod_consum_dh/groups/dh_digitalassets/@dh/@en/documents/digitalasset/dh_4014469.pdf)  
18  
19 <sup>2</sup> Kelsey T, Cavendish W. Personalised Health and Care 2020: Using Data and Technology to Transform  
20 Outcomes for Patients and Citizens. National Information Board 2014.  
21 [https://assets.publishing.service.gov.uk/government/uploads/system/uploads/attachment\\_data/file/38](https://assets.publishing.service.gov.uk/government/uploads/system/uploads/attachment_data/file/384650/NIB_Report.pdf)  
22 [4650/NIB\\_Report.pdf](https://assets.publishing.service.gov.uk/government/uploads/system/uploads/attachment_data/file/384650/NIB_Report.pdf)  
23  
24 <sup>3</sup> Wyatt J, Hoogewerf J, Quinn N. Personal health record (PHR) User insights. *RCP* 2017.  
25 <https://www.rcplondon.ac.uk/projects/outputs/personal-health-record-phr-user-insights> (accessed 3  
26 Sep 2018).  
27  
28 <sup>4</sup> Ozok AA, Wu H, Garrido M, Pronovost PJ, Gurses AP. Usability and perceived usefulness of personal  
29 health records for preventive health care: A case study focusing on patients' and primary care providers'  
30 perspectives. *Applied ergonomics*. 2014 May 1;45(3):613-28.  
31  
32 <sup>5</sup> PHR locations map - NHS Digital. NHS Digital. 2018. [https://digital.nhs.uk/services/personal-health-](https://digital.nhs.uk/services/personal-health-records-adoption-toolkit/phr-locations-map)  
33 [records-adoption-toolkit/phr-locations-map](https://digital.nhs.uk/services/personal-health-records-adoption-toolkit/phr-locations-map) (accessed 3 Sep 2018).  
34  
35 <sup>6</sup> Wyatt J, Sathanandam S, Rastall P. Personal health record (PHR) landscape review Final report. *RCP*  
36 2016. <https://www.rcplondon.ac.uk/projects/outputs/personal-health-record-phr-landscape-review>  
37 (accessed 3 Sep 2018).  
38  
39 <sup>7</sup> NHS statistics, facts and figures. *Nhsconfed.org*. 2017. [http://www.nhsconfed.org/resources/key-](http://www.nhsconfed.org/resources/key-statistics-on-the-nhs)  
40 [statistics-on-the-nhs](http://www.nhsconfed.org/resources/key-statistics-on-the-nhs) (accessed 3 Sep 2018).  
41  
42 <sup>8</sup> Benson T. Principles of health interoperability HL7 and SNOMED. 2nd ed. London: : Springer 2012.  
43  
44 <sup>9</sup> Farenden J, Singh I. Local Health and Care Record Exemplars: A summary. *NHS England*. 2018.  
45 [https://www.england.nhs.uk/wp-content/uploads/2018/05/local-health-and-care-record-exemplars-](https://www.england.nhs.uk/wp-content/uploads/2018/05/local-health-and-care-record-exemplars-summary.pdf)  
46 [summary.pdf](https://www.england.nhs.uk/wp-content/uploads/2018/05/local-health-and-care-record-exemplars-summary.pdf)  
47  
48 <sup>10</sup> Personal communication  
49  
50 <sup>11</sup> £37.5m investment in Digital Innovation Hubs to tackle Britain's biggest health challenges - Health  
51 Data Research UK. *HDR UK*. 2018. [https://www.hdruk.ac.uk/news/37-5m-investment-in-digital-](https://www.hdruk.ac.uk/news/37-5m-investment-in-digital-innovation-hubs/)  
52 [innovation-hubs/](https://www.hdruk.ac.uk/news/37-5m-investment-in-digital-innovation-hubs/) (accessed 26 Nov 2018).  
53  
54  
55  
56  
57  
58  
59  
60

- 1  
2  
3  
4  
5  
6  
7  
8  
9  
10  
11  
12  
13  
14  
15  
16  
17  
18  
19  
20  
21  
22  
23  
24  
25  
26  
27  
28  
29  
30  
31  
32  
33  
34  
35  
36  
37  
38  
39  
40  
41  
42  
43  
44  
45  
46  
47  
48  
49  
50  
51  
52  
53  
54  
55  
56  
57  
58  
59  
60
- <sup>12</sup> National Record Locator Service - Health Developer Network. *Health Developer Network*. 2018. <https://developer.nhs.uk/library/systems/national-record-locator-service/> (accessed 3 Sep 2018).
- <sup>13</sup> NHS App - NHS Digital. *NHS Digital*. 2018. <https://digital.nhs.uk/services/nhs-app> (accessed 26 Nov 2018).
- <sup>14</sup> NHS Digital. Personal communication. 24 Apr 2019.
- <sup>15</sup> Patient Access – GP services at your fingertips. *EMIS Health*. 2018. <https://www.emishealth.com/products/patient-access/> (accessed 26 Nov 2018).
- <sup>16</sup> Patient portal software – About us – Patients Know Best. *Patients Know Best*. 2018. <https://www.patientsknowbest.com/about-us.html> (accessed 26 Nov 2018).
- <sup>17</sup> Who Evergreen Life are & our mission for people powered health. *Evergreen Life*. 2018. <https://www.evergreen-life.co.uk/who-we-are> (accessed 26 Nov 2018).
- <sup>18</sup> Beard L, Schein R, Morra D, Wilson K, Keelan J. The challenges in making electronic health records accessible to patients. *Journal of the American Medical Informatics Association*. 2011 Nov 25;19(1):116-20.
- <sup>19</sup> Guidance for developing Personal Health Records - NHS Digital. *NHS Digital*. 2018. <https://digital.nhs.uk/services/personal-health-records-adoption-toolkit/guidance-for-developing-personal-health-records> (accessed 3 Sep 2018).
- <sup>20</sup> Harwich, E. and Lasko-Skinner, R., 2018. Making NHS data work for everyone.
- <sup>21</sup> Topol E, Health Education England. The Topol Review. Preparing the Healthcare Workforce to Deliver the Digital Future. Health Education England, editor. London, United Kingdom: NHS. 2018:1-48.
- <sup>22</sup> Open Standards principles. *GOV.UK*. 2018. <https://www.gov.uk/government/publications/open-standards-principles/open-standards-principles> (accessed 3 Sep 2018).
- <sup>23</sup> Wachter R. Making IT work: harnessing the power of health information technology to improve care in England. Report to the National Advisory Group on Health Information Technology in England. London: The Stationery Office. 2016 Sep 7.
- <sup>24</sup> Public Accounts Committee. The dismantled National Programme for IT in the NHS. Nineteenth Report of the Session. 2013;14.



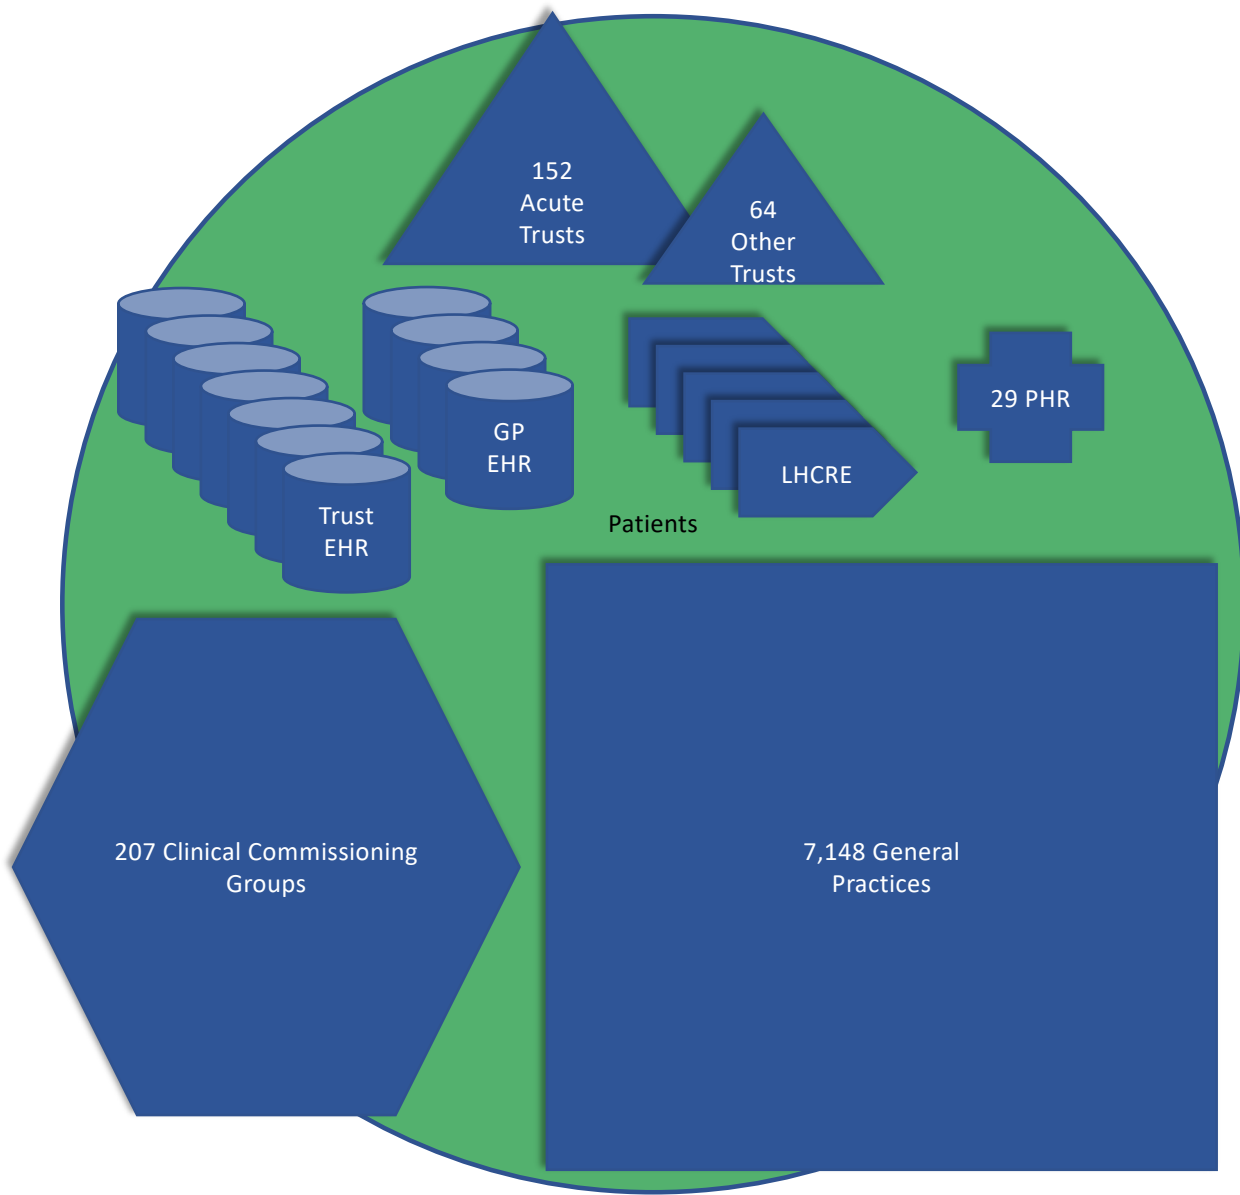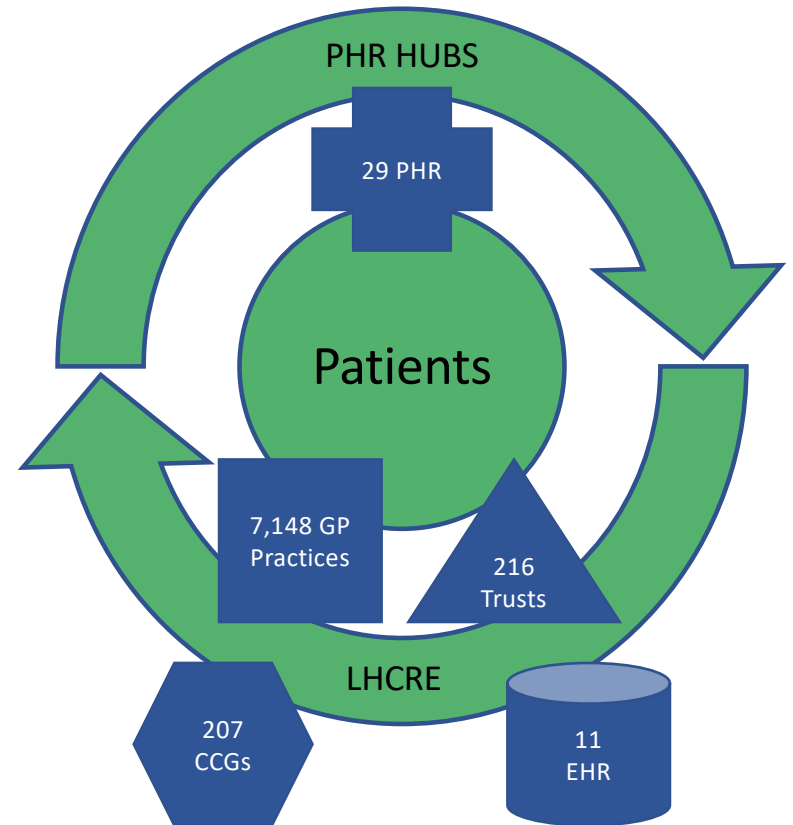

1  
2  
3  
4  
5  
6  
7  
8  
9  
10  
11  
12  
13  
14  
15  
16  
17  
18  
19  
20  
21  
22  
23  
24  
25  
26  
27  
28  
29  
30  
31  
32  
33  
34  
35  
36  
37  
38  
39  
40  
41  
42  
43  
44  
45  
46
